Word count: 3963

Abstract: 248

Figures: 2

Tables: 0

Supplementary material: 1

# **Subcortical volume and white matter integrity abnormalities in major depressive disorder: findings from UK Biobank (N=4446)**

Xueyi Shen <sup>1\*</sup>, Lianne Reus <sup>1</sup>, Mark J. Adams <sup>1</sup>, Simon R. Cox <sup>2,3</sup>, Ian J. Deary <sup>2,3</sup>, David C. Liewald <sup>3</sup>, Mark E. Bastin <sup>2</sup>, Daniel J. Smith <sup>4</sup>, Heather C. Whalley <sup>1</sup>, Andrew M. McIntosh <sup>1,2</sup>

<sup>1</sup> Division of Psychiatry, The University of Edinburgh, Edinburgh, United Kingdom

<sup>2</sup> Centre for Cognitive Ageing and Cognitive Epidemiology, The University of Edinburgh, Edinburgh, United Kingdom

<sup>3</sup> Department of Psychology, The University of Edinburgh, Edinburgh, United Kingdom

<sup>4</sup> Institute of Health and Wellbeing, Mental Health and Wellbeing Research Group, University of Glasgow, Glasgow, United Kingdom

\* Correspondence: Ms Xueyi Shen

University of Edinburgh

Royal Edinburgh Hospital

Morningside Park

Edinburgh EH10 5HF

United Kingdom

Email: [s1517658@sms.ed.ac.uk](mailto:s1517658@sms.ed.ac.uk)

## Abstract:

**Background:** Previous reports of altered grey and white matter structure in Major Depressive Disorder (MDD) have been inconsistent. Recent meta-analyses have, however, reported reduced hippocampal grey matter volume in MDD and reduced white matter integrity in several brain regions. The use of different diagnostic criteria, different scanners and imaging sequences may, however, obscure further anatomical differences.

**Methods:** In this study, we tested for differences in subcortical grey matter volume and white matter integrity between depressed individuals and controls in a large sample of subjects from the first data release of the UK Biobank imaging study of 4446 individuals, which used consistent diagnostic criteria at a single assessment centre, with a single MRI scanner and protocol.

**Results:** Whilst we found no significant differences in subcortical volumes, we report significant reductions in depressed individuals versus controls in global white matter integrity, as measured by fractional anisotropy (FA) ( $\beta = -0.187$ ,  $p = 0.017$ ). We also report reductions in FA in association/commissural fibres ( $\beta = -0.184$ ,  $p = 0.019$ ) and thalamic radiations ( $\beta = -0.175$ ,  $p = 0.027$ ). Examining tracts individually, we report tract-specific FA reductions in the left superior longitudinal fasciculus ( $\beta = -0.218$ ,  $p_{\text{corrected}} = 0.012$ ) and superior thalamic radiation ( $\beta = -0.258$ ,  $p_{\text{corrected}} = 0.010$ ) in subjects with depression.

Conclusions: Our findings highlight the need for further large adequately-powered studies of depression and provide further evidence for disrupted white matter integrity in the disorder. Future studies would focus on exploring the typical neuro-phenotype in homogenous subgroups of depression.

## Introduction

Major Depression Disorder (MDD) is a common psychiatric illness, affecting between 5 and 30% of the population (1) and accounts for around 10% of all days lived with disability (2). There is therefore an urgent need to identify the mechanisms underlying MDD (3; 4) and human *in vivo* MRI has been widely applied in this search.

Many brain imaging studies have measured grey matter volume differences between healthy individuals and, predominantly clinically ascertained, individuals with MDD. On the basis that prefrontal cortex and limbic areas are fundamental to emotion processing and mood regulation (5–7), these areas have been consistently implicated in the disorder (8–11). As the use of automated methods such as voxel-based morphometry (12; 13) and Freesurfer (14; 15) have increased, this has expanded the search across the whole brain. In general, structural abnormalities have been reported across diverse brain networks in MDD. Regions including the thalamus (16), amygdala (9; 17), insula (12), caudate (14), anterior cingulate cortex (9), along with prefrontal areas like orbital prefrontal cortex (OFC)(18) and dorsal lateral prefrontal cortex (PFC)(19; 20) have been reported to be smaller in MDD versus healthy controls. However, other studies have found opposite results, showing that the volumes of such regions in patient population are comparatively larger (14; 21), or have reported null findings. This

inconsistency has been suggested to originate from the effect of limited sample sizes and other sources of heterogeneity such as sample characteristics, recruitment criteria, data acquisition and image processing (8; 22).

The lack of a single lesion or anatomically circumscribed abnormality in MDD has led many to suggest that the disorder might be due to abnormalities of brain networks affecting connections between several regions. In support of this, findings from individual studies of white matter structure in MDD have shown patterns of alteration using diffusion tensor imaging (DTI). Proxy measures of white matter integrity, including fractional anisotropy (FA) and mean diffusivity (MD), have generally been used to infer connectivity differences between groups. Decreased FA indicates lower directionality of water molecule diffusion along fibre pathways and is therefore a proxy of decreased tract integrity, whilst increased MD indicates less constrained water molecule diffusion and therefore also lower integrity.

White matter integrity of frontal-limbic tracts have been suggested to underlie clinical features in MDD due to a lack of frontal cortical control over brain regions that involve in emotion processing (23–27). Studies have reported altered water diffusivity of white matter tracts in MDD compared to healthy controls, but the implicated tracts are often inconsistent. Pérez-Iglesias *et al.* (2010) tested 31 MDD patients and 30 healthy controls,

and reported decreased FA in MDD patients in connections between prefrontal and limbic areas (e.g. fronto-occipital fasciculus, superior longitudinal fasciculus) (28). While some studies using similar sample sizes also found consistent results (29), other groups reported FA deficits in limbic areas alone (e.g. posterior thalamic radiation, posterior corona radiata) (24). Similar to the studies of subcortical volumes described above, DTI investigations of MDD have often involved small sample sizes (29; 30), with a similar risks of false positive findings.

Meta-analytic methods may help to overcome issues related to small sample sizes and are also able to formally test for between-study heterogeneity (29–31). A recent large-scale meta-analysis of subcortical structures by Schmaal *et al.* (32) tested over 1650 MDD patients and around 7000 healthy controls across 15 studies, and reported hippocampal grey matter volume reductions in MDD. No other case-control differences were found (32). Meta-analyses of white matter integrity measures in MDD have also reported FA reductions in superior longitudinal fasciculus, fronto-occipital fasciculus, and thalamic radiations (29; 30). These studies, however, often require the combination of imaging data from different scanners, using different ascertainment criteria and methodology, different clinical instruments and have differing levels of phenotypic data to pursue further research questions. Meta-analytic findings therefore highlight the pressing need to measure brain structural abnormalities in MDD using larger single-scanner

samples where robust conclusions can be made in the absence of differing study methodologies.

In the current study, we examined the volumetric structural imaging data of subcortical brain structures and tract-specific white matter integrity measures from the UK Biobank imaging study (33). UK Biobank is a study of 500,000 subjects recruited from across the United Kingdom. The dataset used in the current study is the first release of imaging data on 4446 participants who completed the brain imaging assessment. The scanning protocol was devised by UK Biobank, with consistent, compatible setting of scanner parameters and participant-friendly experimental procedures. This data therefore allowed us to explore structural changes associated with depression in a single large population-based sample using data from an individual study source with unified depression classification, and with scanning sequences and image processing procedures applied consistently across all subjects, all of whom were imaged on a single MRI scanner.

## Method

### Participants

In the first release of imaging data from UK Biobank, 4446 people completed the subcortical brain structural MRI measurements. The study has been approved by the National Health Service (NHS) Research Ethics Service (approval letter dated 17th June 2011, reference: 11/NW/0382), and by the UKB Access Committee (Project #4844). Written informed-consent was obtained from each subject.

Individuals from the initial pilot phase of imaging using different acquisition parameters were excluded from the current study as were, those that did not complete pre-processing quality checks (conducted by UK Biobank). In addition, scans from individuals that were identified by our internal quality check as having a structural measure that lay more than three standard deviations from the sample mean were excluded. Any participants that had a diagnosis of Parkinson's Disease, bipolar disorder, multiple personality disorder, schizophrenia, autism or intellectual disability were also excluded from the current analysis (ICD-10/9 or self-report). This resulted in data from 4165 participants with T1-weighted subcortical volumes and 3461 participants with DTI measures. Mean ages were 55.54 +/- 7.56 years for those with T1-weighted, grey matter data and 55.53 +/- 7.50 years for those with DTI, white matter integrity. The proportions of male participants are were similar in both datasets (45.83% for those providing T1-weighted data and



47.82% for those with DTI measures). Details of data exclusions were in the supplementary materials (Method, Participants).

## **MDD definitions**

The definition of MDD used in the current study was generated based on the putative MDD category summarized previously by Smith *et al.*, as presented in supplementary materials (Table S1) (34). They generated the criteria of single episode major depression, recurrent major depression (moderate), recurrent major depression (severe) and those who were absent of depression. This category was benchmarked by testing its prevalence in the sample, and by testing for association with a number of traits, such as neuroticism (35) that have previously been associated with MDD (36). However, since the category is based on hospital admission data and depressive symptoms, which were both self-reported, rather than more formal ICD/SCID criteria, we considered the cases more strictly as ‘probable’ MDD and results should be viewed accordingly.

We generated two definitions of probable MDD. One was the principal MDD definition that compared MDD patients with healthy controls, while the other was the recurrent MDD definition which compared recurrent MDD patients with non-recurrent and non-MDD individuals.

The principal MDD definition included those who were categorised in single episode major depression, recurrent major depression (moderate) and

recurrent major depression (severe) as cases. The corresponding control group contained participants that were absent of depression according to the putative MDD category described by Smith *et al* (34). For the recurrent MDD definition, the case group only included recurrent major depression (both moderate and severe). The corresponding control group therefore referred to the participants without recurrent MDD, which included single episode major depression, those who were absent of depression and those who reported depressive symptoms but not enough to be specified as MDD. For the participants with any of the questions that we used for classification unanswered, they would neither be included as cases nor controls.

For each definition of probable MDD, the participants with subcortical volume data consisted of 245 MDD + 576 controls and 178 MDD + 845 controls respectively for principal and recurrent definitions. Participants with DTI data consisted of 233 MDD + 542 controls and 166 MDD + 791 controls for principal and recurrent definitions respectively.

The descriptions and demographic characteristics of each MDD definition are shown in supplementary materials (Table S1, S2). For the purposes of the current analysis, we used the principal definition of depression as the main definition as it most closely resembles the general application of typical clinical criteria. We also report results of the recurrent definition of MDD in

order to highlight differences associated with a more severe recurrent MDD diagnosis. (Supplementary materials, Table S2).

## **MRI acquisition and analyses**

We used the imaging-derived phenotypes (IDPs) generated by UK Biobank (<https://www.aievolution.com/hbm1601/index.cfm?do=abs.viewAbs&abs=3664>). The MRI acquisition and analyses were both conducted by UK Biobank using standard protocols (<http://biobank.ctsu.ox.ac.uk/crystal/refer.cgi?id=2367>, <http://biobank.ctsu.ox.ac.uk/crystal/refer.cgi?id=1977>). MRI data were acquired using a Siemens Skyra 3T scanner (<https://www.healthcare.siemens.com/magnetic-resonance-imaging>). The sequence for the T1-weighted data was a standard 3D MPRAGE scan (resolution 1 mm<sup>3</sup> isotropic voxels), while for the DTI data, the diffusion preparation was a standard (“monopolar”) Stejskal-Tanner pulse sequence with a multi-shell acquisition ( $b = 0, 1000$  and  $2000$  s/mm<sup>2</sup>; resolution 8 mm<sup>3</sup> isotropic voxels). Images were preprocessed and analysed with the FMRIB Software Library (FSL) (<http://www.fmrib.ox.ac.uk/fsl>). Descriptions with detail were reported in supplementary materials (Method, MRI acquisition and preprocessing).

Segmentation of subcortical volumes was performed with FIRST (FMRIB's Integrated Registration and Segmentation Tool) (37). The volumes

of whole brain, thalamus, putamen, pallidum, hippocampus, caudate, brain stem, amygdala and accumbens were calculated for further analysis. DTI tracts were defined with AutoPtx (38) . This tractography tool maps 27 major tracts (12 bilateral tracts in both hemispheres and 3 tracts that pass across brain). Tracts were classed into three categories based on the atlas summarized by Wakana *et al.* (2004) (39) and Cox *et al.* (2016) (40): (a) *association and commissural fibres*: forceps major and minor, inferior fronto-occipital fasciculus, uncinate fasciculus, cingulum bundle and superior longitudinal fasciculus; (b) *thalamic radiations*: anterior, superior and posterior thalamic radiations; (c) *projection fibres*: corticospinal tract, acoustic radiation, medial lemniscus, middle cerebellar peduncle. The overall list of white matter tracts are listed in the supplementary materials (Table S4). Tract-averaged FA for each tract was calculated for further analysis.

Scans with severe and obvious normalization problems were excluded by UK Biobank. We also excluded outliers from analysis, as detailed above. Observations that were more than 3 standard deviation from the sample mean were classed as outliers and were excluded from the analysis of subcortical volumes. For DTI measures, participants with at least one tract-averaged FA more than 3 standard deviation from the mean for the sample were excluded for that measure. Descriptions of the sample were reported in supplementary materials (Table S2).

## Statistical methods

**Subcortical volumes:** First, differences in global intracranial volume (ICV) associated with a probable MDD diagnosis were examined by modelling ICV as dependent variable, controlling for age, age<sup>2</sup> and sex. ICV was measured by adding up volumes of white matter (WM), grey matter (GM) and cerebrospinal fluid (CSF). For bilateral subcortical volumes, age, age<sup>2</sup>, sex, hemisphere and ICV were set as covariates in a repeated-effect linear model to test the predictive effect of probable MDD definition on subcortical volumes controlling for whole brain size (lme function in nlme package of R (41)). For unilateral structures, a random-effect general linear model was applied as above, without controlling for hemisphere. We also examined the interaction of hemisphere and MDD definitions on bilateral structures. Where there showed significant effect, separate analyses on both hemispheres were conducted using the model applied on unilateral structures. All subcortical volumes were rescaled into zero mean and unitary standard deviation in order that effect sizes represent standardized scores. False Discovery Rate (FDR) multiple comparison correction was applied for tests of the 8 subcortical volumes, conducted separately for the two probable MDD definitions (Fig. 1, Table S3).

**White matter integrity:** In order to test for an association between probable MDD and FA, as above we used a general linear model with age, age<sup>2</sup> and sex as covariates and the definition of MDD as a fixed factor. First we

examined for the effects of diagnosis on global whole brain white matter integrity. The brain's white matter tracts have been shown to share a considerable proportion of variance in their microstructural properties in this (40) and other samples (42; 43). Global white matter integrity was determined using standardised approaches (44) by applying principal component analysis (PCA) on the 27 tracts to extract a latent measure. Scores of the first unrotated component of FA were extracted and set as the dependent variable of the general linear model to test the effect of probable MDD diagnosis (variance explained = 35.6%, loadings of tracts on the first latent component > 0.22). Then we separately examined three subsets of white matter tracts: (a) association and commissural fibres which include tracts connecting cortex to cortex, (b) projection fibres which consist of tracts connecting cortex to spinal cord and cortex to limbic pathways and (c) thalamic radiations including tracts that connect thalamus with cortical areas, see Cox *et al* (40). Scores of the principal unrotated component for each subset was extracted (variance explained = 43.9%, 59.3% and 37.8%; and the smallest loading on the first component = 0.34, 0.73 and 0.44 respectively for each subset) for further general linear modelling as with the global latent measure. Finally we examined the effects of depression on each tract individually. Repeated-effect linear models were used for the measures of bilateral white matter tracts correcting for hemisphere as above, while random-effect general linear models were used for the unilateral midline tracts. Both the main effect of

MDD definition and its interaction with hemisphere were tested. Where the interaction was significant, tests were applied individually for left and right sides separately. FDR correction was individually applied over the three subsets of white matter tracts as well as individual tracts (45).

## Results

### The effect of MDD definitions on subcortical volumes

We found no significant group effect for ICV based on the principal definition of MDD ( $\beta = 0.026$ ,  $p = 0.677$ ). There were also no significant differences between groups based on the principal definition of MDD for any of the subcortical brain regions, including the hippocampus ( $\beta$ s =  $-0.060 \sim 0.071$ ,  $p_{\text{corrected}} > 0.566$ ); see Fig. 1, Table S3. No region demonstrated significant interaction of hemisphere, therefore no region was examined separately on different hemispheres.

The same models were also applied to compare groups according to the recurrent definition, see above. No subcortical regions reached significance in this definition of recurrent cases versus controls, with the greatest effect size observed for the putamen ( $\beta = 0.071$ ,  $p_{\text{uncorrected}} = 0.197$ ).

### The effect of probable MDD on measures of white matter integrity

Firstly we tested the effect of probable MDD on general white matter FA (gFA). For both the principal and recurrent definitions, gFA was lower in cases versus controls ( $\beta = -0.186$ ,  $p = 0.016$ ;  $\beta = -0.182$ ,  $p = 0.027$  respectively).

We then examined tracts categorised into association fibres, thalamic



radiations and projection fibres. We found effects of probable MDD on measures of FA in two of the three groups of tracts. Probable MDD at principal and recurrent definitions showed smaller FA values in association and commissural fibres ( $\beta_{\text{principal}} = -0.184$ ,  $p_{\text{principal}} = 0.019$ ;  $\beta_{\text{recurrent}} = -0.187$ ,  $p_{\text{recurrent}} = 0.026$ ) and in the thalamic radiations ( $\beta_{\text{principal}} = -0.177$ ,  $p_{\text{principal}} = 0.024$ ;  $\beta_{\text{recurrent}} = -0.181$ ,  $p_{\text{recurrent}} = 0.031$ ). The above p values all passed FDR correction over the three categories. No effect was found for projection fibres ( $\beta_{\text{principal}} = -0.093$ ,  $p_{\text{principal}} = 0.228$ ;  $\beta_{\text{recurrent}} = -0.013$ ,  $p_{\text{recurrent}} = 0.879$ ).

We then proceeded to compare FA values in the individual tracts between cases and controls. Initially, we tested the tracts controlling for hemisphere effects. Then we tested the interaction of hemisphere and probable MDD definitions on bilateral tracts to identify any lateralised effects. There was a significant interaction of hemisphere in superior longitudinal fasciculus for recurrent definition of probable MDD ( $\beta = 0.154$ ,  $p_{\text{corrected}} = 0.013$ ). The left and right superior longitudinal fasciculi were therefore tested separately.

We found reduced FA in the superior thalamic radiations for the principal definition of MDD versus controls ( $\beta = -0.258$ ,  $p_{\text{corrected}} = 0.01$ ) (Fig. 2, Table S3). There was, however, no significant effect of the recurrent MDD definition on superior thalamic radiation FA ( $\beta = -0.234$ ,  $p_{\text{corrected}} = 0.081$ ) although the effect size was similar in magnitude. We also found a significant association of MDD with the left superior longitudinal fasciculus for both principal ( $\beta =$

-0.218,  $p_{\text{corrected}} = 0.043$ ) and recurrent definitions ( $\beta = -0.269$ ,  $p_{\text{corrected}} = 0.002$ ).

No significant association was found with right superior longitudinal fasciculus

( $\beta_{\text{principal}} = -0.070$ ,  $p_{\text{principal}} = 0.437$ ;  $\beta_{\text{recurrent}} = -0.084$ ,  $p_{\text{recurrent}} = 0.407$ ).

## Discussion

In the current study we sought to determine whether MDD was associated with differences in subcortical grey matter volume or white matter integrity in a large imaging dataset from a single scanner of more than 4000 individuals. The sample sizes of MDD cases and controls included in the analyses of white matter integrity is by far the largest to our knowledge. Whilst we did not find any statistically significant subcortical volumetric differences between unaffected participants and individuals with probable MDD (using any of the definitions with increasing severity), we did find substantial evidence of reduced white matter integrity in MDD. This was seen globally, in two of the three categories of tracts (association and commissural fibres, and thalamic radiation tracts), and in individual tracts (bilateral superior thalamic radiations and left superior longitudinal fasciculus). Similar patterns of findings were seen for both principal and recurrent definition of depression with generally greater effect sizes in recurrent cases, with the exception of the localised differences in the superior thalamic radiation.

Our study notably did not find evidence for bilateral hippocampal volume reduction as previously reported in the large collaborative meta-analysis of MDD (32). We also did not find evidence of reductions in hippocampal volume when looking at recurrent MDD as published in the same review. The lack of subcortical volumetric differences associated with probable MDD diagnoses

in the current study therefore does not support the widely held belief that there are subcortical volumetric changes associated with the disorder. There are several potential explanations for this. Firstly, the UK Biobank dataset included only community-dwelling, ambulant individuals who could independently complete the health and cognitive assessments, and attend the follow-up imaging assessments. This approach arguably selected MDD groups that were more well/better functioning but equally more representative of the general population than purely clinically ascertained samples. We also used a composite 'probable' MDD diagnosis that was based on self-report symptoms and hospital admission statistics. In contrast, many other studies previously used a structured clinical interview schedule, such as the Structured Clinical Interview for DSM-IV (SCID), to define MDD according to standard criteria. Whilst the probable MDD definitions used in the current paper were not based on an interview, they showed many of the same epidemiological and risk-factor associations as clinically defined cases (34; 46).

Although we do not report subcortical volume differences, we did find substantive evidence for robust deficits in both global and local white matter integrity. We found that MDD patients had global loss of FA which was also found to be reduced in association and commissural fibres as well as in thalamic radiations, but not in projection fibres. FA in these structures was also more severely reduced in the recurrent MDD patients. The above results

indeed reflect previous findings from previous small-sample and meta-analytic studies (29; 47; 48), while extending them to a more generalizable population-based cohort excluding potential methodological confounds as associated with the previous studies. A previous meta-analytic study that compared 231 MDD patients with 261 healthy participants found reduced FA in inferior longitudinal fasciculus, inferior fronto-occipital fasciculus, posterior thalamic radiation and corpus callosum, which belong to the association/commissural fibres and thalamic radiations (29). Following the above study, another two recent meta-analyses found integrity reductions in the same categories, i.e. dorsal lateral PFC area, commissural fibres (48; 49). The global loss of FA in these regions could be the result of general neurodevelopmental alterations in MDD patients (23), and findings within defined subsets of white matter tracts could reflect the neurological basis of MDD as a disconnection within an integrated network of cortex-cortex and cortical-limbic pathways (50). The general FA reductions in groups of tracts is also consistent with findings from resting-state fMRI studies, which reported abnormalities in MDD populations in regional networks rather than just individual regions or structures (11; 51; 52). The networks that derive from prefrontal cortex and thalamus has been found largely contribute to emotional and social cognition processes (23). The reduced integrity in these groups of tracts may therefore reflect the repeatedly found impairment of emotion

regulation(53–55), reward processing (56; 57) and executive control (31) in MDD populations.

In the tests of single white matter tracts, we found significantly altered integrity in left superior longitudinal fasciculus both in the overall MDD population and to a greater extent in recurrent MDD patients. Reduction of integrity in superior thalamic radiation was also found in MDD compared with healthy subjects, however showed no specific change of FA in recurrent MDD.

Superior longitudinal fasciculus, as a part of association fibres, connects prefrontal cortex and other lobes (58). Small-sample studies have specifically reported reduced integrity in superior longitudinal fasciculus in various depressive samples, including elderly patients with depression (23; 59), depressive adolescents (60) and adolescents with familial risk for depression (58), compared with controls. Meta-analytic studies (48; 61) and a review (47) also ascertained that the reduction of white matter integrity specifically in superior longitudinal fasciculus may be an important biomarker of the presence of depression. A recent study combined genetic and neuroimaging techniques found that people with higher polygenic risk of depression have greater loss of FA in superior longitudinal fasciculus (62), suggesting that it may also therefore be a useful trait-related marker of risk. Loss of integrity in superior longitudinal fasciculus has also previously been reported to be

associated with various cognitive dysfunctions, like working memory (63) and attention (61). Severity of depressive symptoms was also found correlate with FA loss in superior longitudinal fasciculus (64). There is increasingly convincing evidence therefore that reduced integrity in superior longitudinal fasciculus might be an important feature of the neurobiology of MDD and may underlie impaired emotional process and cognitive abilities in MDD population (30).

Two potential limitations of the current study should be considered, these include the absence of a structured diagnostic interview schedule and the lack of hospital-based sampling. The large sample size may, however, overcome some of these difficulties and community based population sampling may yield more generalizable findings than those based on clinically ascertained samples alone (12; 65; 66). The current investigation, by avoiding the combination of clinically and methodologically diverse samples, may also have ameliorated several important confounds. The second limitation is that for the volumetric analysis we only focused on the subcortical volumes in the current study. We can therefore not exclude the possibility of cortical differences in MDD, including regional volume differences, as well as measures of cortical thickness and gyrification for example.

Our study presents a comprehensive comparison of brain structural changes related to MDD using the largest single sample available to date

from a single scanner with uniform methodologies for clinical categorisation and scanning. We mainly report reductions of white matter FA in general latent measures of association and commissural fibres as well as thalamic radiations, and in left superior longitudinal fasciculus both in MDD and recurrent MDD. Future work would be potentially focusing on structural changes in cortical areas as well as richer stratification of MDD into informative biologically-based subgroups.



## Acknowledgements

This study is supported by a Wellcome Trust Strategic Award “Stratifying Resilience and Depression Longitudinally” (STRADL) (Reference 104036/Z/14/Z).

We thank the UK Biobank participants for their participation, and the UK Biobank team for their work in collecting and providing these data for analysis.

This research was conducted, using the UK Biobank Resource under approved project 10279, in The University of Edinburgh Centre for Cognitive Ageing and Cognitive Epidemiology (CCACE) (<http://www.ccace.ed.ac.uk>), part of the cross-council Lifelong Health and Wellbeing Initiative (MR/K026992/1). XS receives support from China Scholarship Council. HCW is supported by a JMAS SIM fellowship from the Royal College of Physicians of Edinburgh and by an ESAT College Fellowship from the University of Edinburgh. SRC was supported by MRC grant MR/M013111/1. IJD and DCL are supported by the Medical Research Council award to CCACE (MR/K026992/1). IJD is additionally supported by the Dementias Platform UK (MR/L015382/1), and he and SRC by the Age UK-funded Disconnected Mind project (<http://www.disconnectedmind.ed.ac.uk>). DJS is supported by an Independent Investigator Award from the Brain and Behaviour Research Foundation (21930). Part of the work was undertaken in The University of Edinburgh Centre for Cognitive Ageing and Cognitive Epidemiology (CCACE),

part of the cross council Lifelong Health and Wellbeing Initiative (MR/K026992/1); funding from the Biotechnology and Biological Sciences Research Council (BBSRC) and Medical Research Council (MRC) is gratefully acknowledged. Age UK (The Disconnected Mind project) also provided support for the work undertaken at CCACE.

## **Conflicts of Interest**

AMM has previously received grant support from Pfizer, Lilly and Janssen. These studies are not connected to the current investigation. Remaining authors report no conflicts of interest.

## References

1. Kendler KS (2013): What psychiatric genetics has taught us about the nature of psychiatric illness and what is left to learn. *Mol Psychiatry*. 18: 1058–1066.
2. Marcus M, Yasamy MT, Ommeren M van, Chisholm D, Saxena S (2012): *Depression: A Global Public Health Concern*. Retrieved from [http://www.who.int/mental\\_health/management/depression/who\\_paper\\_depression\\_wfmh\\_2012.pdf](http://www.who.int/mental_health/management/depression/who_paper_depression_wfmh_2012.pdf).
3. Gamazon ER, Wheeler HE, Shah KP, Mozaffari S V, Aquino-Michaels K, Carroll RJ, et al. (2015): A gene-based association method for mapping traits using reference transcriptome data. *Nat Genet*. 47: 1091–1098.
4. Levinson DF, Mostafavi S, Milaneschi Y, Rivera M, Ripke S, Wray NR, Sullivan PF (2014): Genetic studies of major depressive disorder: why are there no genome-wide association study findings and what can we do about it? *Biol Psychiatry*. 76: 510–512.
5. DeRubeis RJ, Siegle GJ, Hollon SD (2008): Cognitive therapy versus medication for depression: treatment outcomes and neural mechanisms. *Nat Rev Neurosci*. 9: 788–796.
6. Sheline YI, Price JL, Yan Z, Mintun M a. (2010): Resting-state functional MRI in depression unmasks increased connectivity between networks via the dorsal nexus. *Proc Natl Acad Sci*. 107: 11020–11025.
7. Versace A, Almeida JRC, Quevedo K, Thompson WK, Terwilliger RA, Hassel S, et al. (2010): Right orbitofrontal corticolimbic and left corticocortical white matter connectivity differentiate bipolar and unipolar depression. *Biol Psychiatry*. 68: 560–567.

8. McKinnon MC, Yucel K, Nazarov A, MacQueen GM (2009): A meta-analysis examining clinical predictors of hippocampal volume in patients with major depressive disorder. *J Psychiatry Neurosci.* 34: 41–54.
9. Bora E, Fornito A, Pantelis C, Yucel M (2012): Gray matter abnormalities in Major Depressive Disorder: A meta-analysis of voxel based morphometry studies. *J Affect Disord.* 138: 9–18.
10. Maller JJ, Thomson RHS, Rosenfeld J V., Anderson R, Daskalakis ZJ, Fitzgerald PB (2014): Occipital bending in depression. *Brain.* 137: 1830–1837.
11. Meng C, Brandl F, Tahmasian M, Shao J, Manoliu A, Scherr M, et al. (2014): Aberrant topology of striatum's connectivity is associated with the number of episodes in depression. *Brain.* 137: 598–609.
12. Soriano-Mas C, Hernandez-Ribas R, Pujol J, Urretavizcaya M, Deus J, Harrison BJ, et al. (2011): Cross-sectional and longitudinal assessment of structural brain alterations in melancholic depression. *Biol Psychiatry.* 69: 318–325.
13. Wagner G, Koch K, Schachtzabel C, Schultz CC, Sauer H, Schl??sser RG (2011): Structural brain alterations in patients with major depressive disorder and high risk for suicide: Evidence for a distinct neurobiological entity? *Neuroimage.* 54: 1607–1614.
14. Sacchet MD, Livermore EE, Iglesias JE, Glover GH, Gotlib IH (2015): Subcortical volumes differentiate Major Depressive Disorder, Bipolar Disorder, and remitted Major Depressive Disorder. *J Psychiatr Res.* 68: 91–98.
15. Mathias SR, Knowles EEM, Kent JW, McKay DR, Curran JE, de Almeida MAA, et al. (2015): Recurrent major depression and right hippocampal

- p>volume: A bivariate linkage and association study.
- Hum Brain Mapp.*
- 202: 191–202.
16. Nugent AC, Davis RM, Zarate CA, Drevets WC (2013): Reduced thalamic volumes in major depressive disorder. *Psychiatry Res - Neuroimaging.* 213: 179–185.
17. Sacher J, Neumann J, Fünfstück T, Soliman A, Villringer A, Schroeter ML (2012): Mapping the depressed brain: A meta-analysis of structural and functional alterations in major depressive disorder. *J Affect Disord.* 140: 142–148.
18. Fried EI, Kievit RA (2015): The volumes of subcortical regions in depressed and healthy individuals are strikingly similar: a reinterpretation of the results by Schmaal et al. *Mol Psychiatry.* 1: 1–2.
19. Vasic N, Walter H, Höse A, Wolf RC (2008): Gray matter reduction associated with psychopathology and cognitive dysfunction in unipolar depression: A voxel-based morphometry study. *J Affect Disord.* 109: 107–116.
20. Amico F., Meisenzahl E., Koutsouleris N., Reiser M., Möller H-J., Frodl T. (2011): Structural MRI correlates for vulnerability and resilience to major depressive disorder. *J Psychiatry Neurosci.* 36: 15–22.
21. Kong L, Wu F, Tang Y, Ren L, Kong D, Liu Y, et al. (2014): Frontal-subcortical volumetric deficits in single episode, medication-naïve depressed patients and the effects of 8 weeks fluoxetine treatment: A VBM-DARTEL study. *PLoS One.* 9: e79055.
22. Arnone D, McIntosh AM, Ebmeier KP, Munafò MR, Anderson IM (2012): Magnetic resonance imaging studies in unipolar depression: Systematic review and meta-regression analyses. *Eur Neuropsychopharmacol.* 22:

- 1–16.
23. Korgaonkar MS, Grieve SM, Koslow SH, Gabrieli JDE, Gordon E, Williams LM (2011): Loss of white matter integrity in major depressive disorder: Evidence using tract-based spatial statistical analysis of diffusion tensor imaging. *Hum Brain Mapp.* 32: 2161–2171.
24. Korgaonkar MS, Williams LM, Song YJ, Usherwood T, Grieve SM (2014): Diffusion tensor imaging predictors of treatment outcomes in major depressive disorder. *Br J Psychiatry.* 205: 321–328.
25. Nobuhara K, Okugawa G, Sugimoto T, Minami T, Tamagaki C, Takase K, et al. (2006): Frontal white matter anisotropy and symptom severity of late-life depression: a magnetic resonance diffusion tensor imaging study. *J Neurol Neurosurg Psychiatry.* 77: 120–122.
26. Ystad M, Hodneland E, Adolfsdottir S, Haasz J, Lundervold AJ, Eichele T, Lundervold A (2011): Cortico-striatal connectivity and cognition in normal aging: A combined DTI and resting state fMRI study. *Neuroimage.* 55: 24–31.
27. Madden DJ, Costello MC, Dennis NA, Davis SW, Shepler AM, Spaniol J, et al. (2010): Adult age differences in functional connectivity during executive control. *Neuroimage.* 52: 643–657.
28. Pérez-Iglesias R, Tordesillas-Gutiérrez D, Barker GJ, McGuire PK, Roiz-Santiañez R, Mata I, et al. (2010): White matter defects in first episode psychosis patients: A voxelwise analysis of diffusion tensor imaging. *Neuroimage.* 49: 199–204.
29. Liao Y, Huang X, Wu Q, Yang C, Kuang W, Du M, et al. (2013): Is depression a disconnection syndrome? Meta- analysis of diffusion tensor imaging studies in patients with MDD. *J Psychiatry Neurosci.* 38: 49–56.

30. Murphy ML, Frodl T (2011): Meta-analysis of diffusion tensor imaging studies shows altered fractional anisotropy occurring in distinct brain areas in association with depression. *Biol Mood Anxiety Disord.* 1: 1–12.
31. Snyder HR (2013): Major depressive disorder is associated with broad impairments on neuropsychological measures of executive function: a meta-analysis and review. *Psychol Bull.* 139: 81–132.
32. Schmaal L, Veltman DJ, van Erp TGM, Sämann PG, Frodl T, Jahanshad N, et al. (2016): Subcortical brain alterations in major depressive disorder: findings from the ENIGMA Major Depressive Disorder working group. *Mol Psychiatry.* 21: 806–812.
33. Sudlow C, Gallacher J, Allen N, Beral V, Burton P, Danesh J, et al. (2015): UK Biobank: An Open Access Resource for Identifying the Causes of a Wide Range of Complex Diseases of Middle and Old Age. *PLoS Med.* 12: 1–10.
34. Smith DJ, Nicholl BI, Cullen B, Martin D, Ul-Haq Z, Evans J, et al. (2013): Prevalence and characteristics of probable major depression and bipolar disorder within UK biobank: cross-sectional study of 172,751 participants. *PLoS One.* 8: e75362.
35. Jylha P, Melartin T, Isometsa E (2009): Relationships of neuroticism and extraversion with axis I and II comorbidity among patients with DSM-IV major depressive disorder. *J Affect Disord.* 114: 110–121.
36. Kendler KS, Kuhn J, Prescott CA (2004): The interrelationship of neuroticism, sex and stressful life events in the prediction of episodes of major depression. *Am J Psychiatry.* 161: 631–636.
37. Patenaude B, Smith SM, Kennedy DN, Jenkinson M (2011): A Bayesian model of shape and appearance for subcortical brain segmentation.

- Neuroimage*. 56: 907–922.
38. De Groot M, Vernooij MW, Klein S, Ikram MA, Vos FM, Smith SM, et al. (2013): Improving alignment in Tract-based spatial statistics: Evaluation and optimization of image registration. *Neuroimage*. 76: 400–411.
  39. Wakana S, Jiang H, Nagae-Poetscher LM, van Zijl PCM, Mori S (2004): Fibre tract-based atlas of human white matter anatomy. *Radiology*. 230: 77–87.
  40. Cox SR, Ritchie SJ, Tucker-Drob EM, Liewald DC, Hagenaars SP, Davies G, et al. (2016): Age differences in brain white matter microstructure in UK Biobank (N= 3,513). *bioRxiv*. 51771.
  41. Bliese P (2016): *Multilevel Modeling in R (2.2)--A Brief Introduction to R, the multilevel package and the nlme package*. Retrieved from [https://cran.r-project.org/doc/contrib/Bliese\\_Multilevel.pdf](https://cran.r-project.org/doc/contrib/Bliese_Multilevel.pdf).
  42. Penke L, Maniega SM, Bastin ME, Valdés Hernández MC, Murray C, Royle N a, et al. (2012): Brain white matter tract integrity as a neural foundation for general intelligence. *Mol Psychiatry*. 17: 1026–1030.
  43. Penke L, Maniega SM, Murray C, Gow AJ, Valdes Hernandez MC, Clayden JD, et al. (2010): A General Factor of Brain White Matter Integrity Predicts Information Processing Speed in Healthy Older People. *J Neurosci*. 30: 7569–7574.
  44. Muetzel RL, Mous SE, van der Ende J, Blanken LME, van der Lugt A, Jaddoe VW V, et al. (2015): White matter integrity and cognitive performance in school-age children: A population-based neuroimaging study. *Neuroimage*. 119: 119–128.
  45. Benjamini Y, Hochberg Y (1995): Controlling the False Discovery Rate - a



- Practical and Powerful Approach to Multiple Testing. *J R Stat Soc Ser B-Methodological*. 57: 289–300.
46. Okbay A, Baselmans BML, De Neve J-E, Turley P, Nivard MG, Fontana MA, et al. (2016): Genetic variants associated with subjective well-being, depressive symptoms, and neuroticism identified through genome-wide analyses. *Nat Genet*. 48: 624–633.
47. Sexton CE, Mackay CE, Ebmeier KP (2009): A Systematic Review of Diffusion Tensor Imaging Studies in Affective Disorders. *Biol Psychiatry*. 66: 814–823.
48. Chen G, Hu X, Li L, Huang X, Lui S, Kuang W, Ai H (2016): Disorganization of white matter architecture in major depressive disorder□: a meta-analysis of diffusion tensor imaging with tract- based spatial statistics. *Sci Rep*. 6: 1–11.
49. Wen MC, Steffens DC, Chen MK, Zainal NH (2014): Diffusion tensor imaging studies in late-life depression: systematic review and meta-analysis. *Int J Geriatr Psychiatry*. 29: 1173–1184.
50. Veer IM (2010): Whole brain resting-state analysis reveals decreased functional connectivity in major depression. *Front Syst Neurosci*. 4: 1–10.
51. Broyd SJ, Demanuele C, Debener S, Helps SK, James CJ, Sonuga-Barke EJS (2009): Default-mode brain dysfunction in mental disorders: A systematic review. *Neurosci Biobehav Rev*. 33: 279–296.
52. Greicius MD, Flores BH, Menon V, Glover GH, Solvason HB, Kenna H, et al. (2007): Resting-state functional connectivity in major depression: abnormally increased contributions from subgenual cingulate cortex and thalamus. *Biol Psychiatry*. 62: 429–37.

53. Heller AS, Johnstone T, Peterson MJ, Kolden GG, Kalin NH, Davidson RJ (2013): Increased prefrontal cortex activity during negative emotion regulation as a predictor of depression symptom severity trajectory over 6 months. *JAMA psychiatry*. 70: 1181–9.
54. Kanske P, Heissler J, Schönfelder S, Wessa M (2012): Neural correlates of emotion regulation deficits in remitted depression: The influence of regulation strategy, habitual regulation use, and emotional valence. *Neuroimage*. 61: 686–693.
55. Monk CS, Monk CS, Klein RG, Klein RG, Telzer EH, Telzer EH, et al. (2008): Amygdala and nucleus accumbens activation to emotional facial expressions in children and adolescents at risk for major depression. *Am J Psychiatry*. 165: 90–8.
56. Gradin VB, Kumar P, Waiter G, Ahearn T, Stickle C, Milders M, et al. (2011): Expected value and prediction error abnormalities in depression and schizophrenia. *Brain*. 134: 1751–1764.
57. Pizzagalli D a, Holmes AJ, Dillon DG, Goetz EL, Birk JL, Bogdan R, et al. (2009): Reduced caudate and nucleus accumbens response to rewards in unmedicated subjects with major depressive disorder. *Am J Psychiatry*. 166: 702–710.
58. Huang H, Fan X, Williamson DE, Rao U (2011): White matter changes in healthy adolescents at familial risk for unipolar depression: a diffusion tensor imaging study. *Neuropsychopharmacology*. 36: 684–91.
59. Sheline YI, Price JL, Vaishnavi SN, Mintun MA, Barch DM, Epstein AA, et al. (2008): Regional white matter hyperintensity burden in automated segmentation distinguishes late-life depressed subjects from comparison subjects matched for vascular risk factors. *Am J Psychiatry*. 165:

524–532.

60. Cullen KR, Klimes-Dougan B, Muetzel R, Mueller B a, Camchong J, Hourii A, et al. (2010): Altered white matter microstructure in adolescents with major depression: a preliminary study. *J Am Acad Child Adolesc Psychiatry*. 49: 173–183.e1.
61. de Schotten MT, Dell'Acqua F, Forkel SJ, Simmons A, Vergani F, Murphy DGM, Catani M (2011): A lateralized brain network for visuospatial attention. *Nat Neurosci*. 14: 1245–1246.
62. Whalley HC, Sprooten E, Hackett S, Hall L, Blackwood DH, Glahn DC, et al. (2013): Polygenic risk and white matter integrity in individuals at high risk of mood disorder. *Biol Psychiatry*. 74: 280–286.
63. Karlsgodt KH, van Erp TGM, Poldrack RA, Bearden CE, Nuechterlein KH, Cannon TD (2008): Diffusion Tensor Imaging of the Superior Longitudinal Fasciculus and Working Memory in Recent-Onset Schizophrenia. *Biol Psychiatry*. 63: 512–518.
64. Lai CH, Wu YT (2014): Alterations in white matter micro-integrity of the superior longitudinal fasciculus and anterior thalamic radiation of young adult patients with depression. *Psychol Med*. 44: 2825–2832.
65. Benedetti F, Yeh PH, Bellani M, Radaelli D, Nicoletti MA, Poletti S, et al. (2011): Disruption of white matter integrity in bipolar depression as a possible structural marker of illness. *Biol Psychiatry*. 69: 309–317.
66. Osoba A, H??nggi J, Li M, Horn DI, Metzger C, Eckert U, et al. (2013): Disease severity is correlated to tract specific changes of fractional anisotropy in MD and CM thalamus - A DTI study in major depressive disorder. *J Affect Disord*. 149: 116–128.

## Figure legends

Figure 1. (A) Subcortical structures of interest in left, inferior and anterior view.

(B) The effect of principal definition of probable MDD on subcortical volumes.

Linear models were conducted, controlling the effect of age, age<sup>2</sup>, sex and intracranial volume (and hemisphere for the regions that have bilateral values). The x-axis shows the standardised effect size of MDD definition, and y-axis is the layout of the subcortical structures. The error bar represents standard deviation of mean.

Figure 2. (A) White matter tracts in each anatomical subset in left, posterior and anterior view. (B) The effect of principal definition of probable MDD on FA value of tracts. Linear models were conducted, controlling the effect of age, age<sup>2</sup> and sex (and hemisphere for the tracts that have bilateral values). Left superior longitudinal fasciculus was presented because there was a significant interaction between recurrent MDD definition and hemisphere.

Follow-up analysis showed a lateral effect of probable MDD definition on left superior longitudinal fasciculus. The x-axis shows the standardised effect size of MDD definition, and y-axis is the layout of the white matter tracts. The error bar represents standard deviation of mean.

(A)

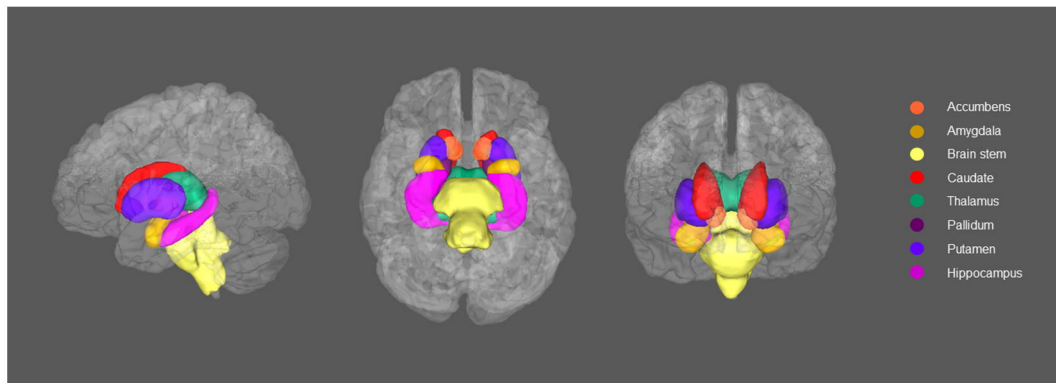

(B)

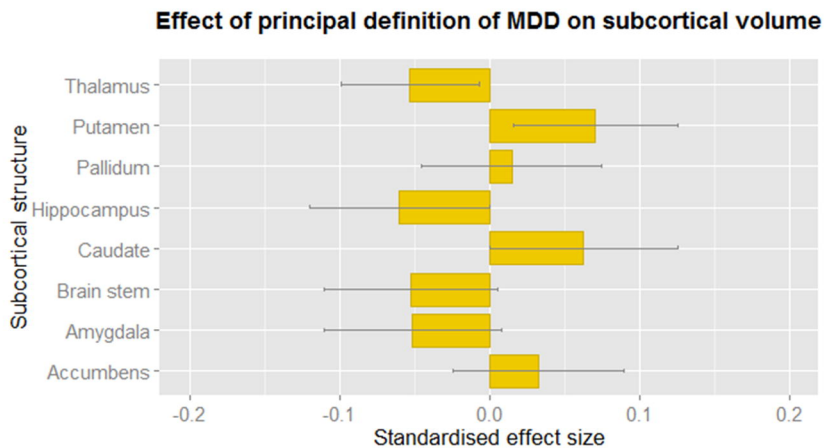

(A)

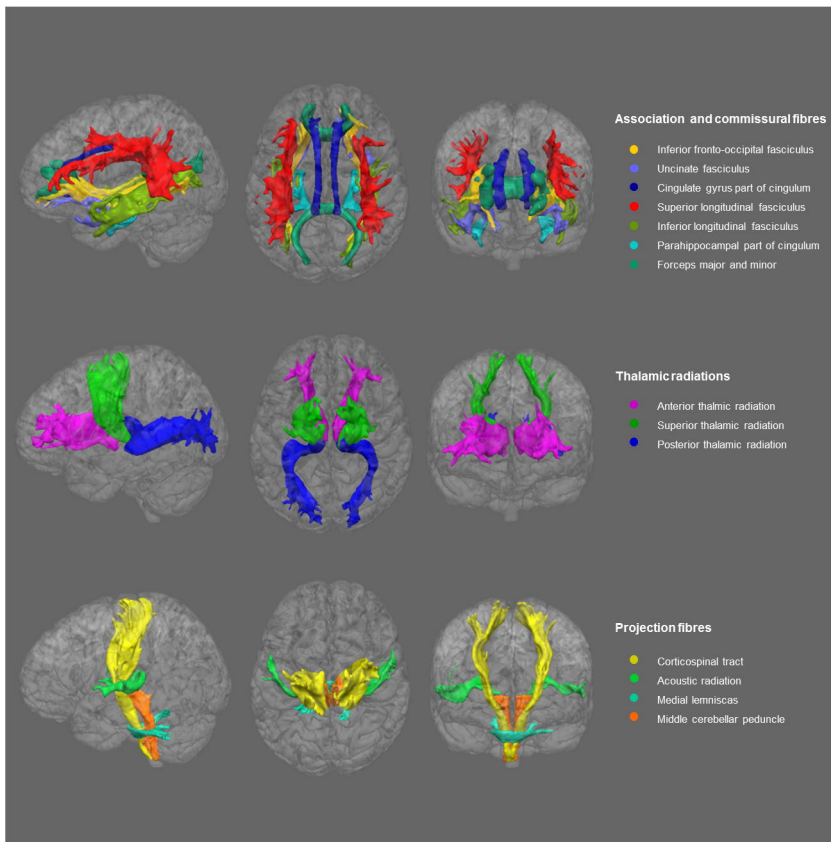

(B)

**Effect of principal MDD definition on fractional anisotropy of white matter tracts**

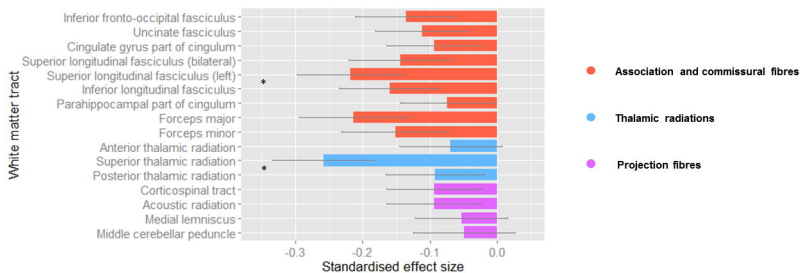

Source: http://biorxiv.org/content/10.1101/070912v1.full.pdf
